# Supplementary material for: Prenylated Flavonoids from Roots of Glycyrrhiza uralensis Induce Differentiation of B16-F10 Melanoma Cells
Source: PubMed Central journal article supplement (PMC6122034; doi:10.3390/ijms19082422), 2018-08-16
Supplement: ijms-19-02422-s001.pdf [file ijms-19-02422-s001.pdf]

## Supporting information

### **Prenylated flavonoids from roots of *Glycyrrhiza uralensis* induce differentiation of B16-F10 melanoma cells**

Yunfeng Zheng <sup>a</sup>, Huaiyou Wang <sup>b,c</sup>, Min Yang <sup>a</sup>, Guoping Peng <sup>a</sup>, Tina T.X. Dong <sup>b,c</sup>, Miranda L. Xu <sup>b,c</sup>, Karl W.K. Tsim <sup>b,c</sup> \*

#### Affiliation

<sup>a</sup> School of Pharmacy, Nanjing University of Chinese Medicine, Nanjing, China

<sup>b</sup> Division of Life Science and Center for Chinese Medicine, The Hong Kong University of Science and Technology, Hong Kong, China;

<sup>c</sup> Shenzhen Key Laboratory of Edible and Medicinal Bioresources, Shenzhen Research Institute, Hi-Tech Park, Shenzhen 518000, China

\*To whom correspondence should be addressed: Prof. Karl W. K. Tsim, Division of Life Science, The Hong Kong University of Science and Technology, Clear Water Bay Road, Kowloon, Hong Kong, China; Tel: (852) 2358-7332; Fax: (852) 2358-1559; Email: botsim@ust.hk

## Contents

Part 1. The MS and  $^1\text{H}$  NMR data of 10 flavonoid compounds

Part 2. HPLC of dichloromethane extract of *G. uralensis* and isolated flavonoids

## Part 1. The MS and <sup>1</sup>H NMR data of 10 flavonoid compounds

**GF-1:** faint yellow needle crystal; HR-ESI/MS:  $m/z$  353.1024  $[M+H]^+$ ; molecular formula: C<sub>20</sub>H<sub>16</sub>O<sub>6</sub>; <sup>1</sup>H NMR (DMSO-d<sub>6</sub>, δ, ppm): 1.38 (6H, s, 5''-H and 6''-H), 5.68(1H, d,  $J=10.0$ , 3''-H), 6.23(1H, d,  $J=1.9$ , 6-H), 6.33(1H, d,  $J=8.3$ , 5'-H), 6.40(1H, d,  $J=1.9$ , 8-H), 6.67(1H, d,  $J=10.0$ , 4''-H), 6.89(1H, d,  $J=8.3$ , 6'-H), 8.18(1H, s, 2-H), 8.85(1H, s, 2'-OH), 10.83(1H, s, 7-OH), 12.85(1H, s, 5-OH). <sup>1</sup>H and <sup>13</sup>C NMR data were identical with the literature values of Licoisoflavone B <sup>[1]</sup>.

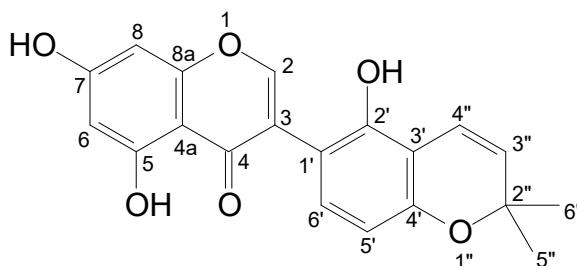

**Licoisoflavone B**

**GF-2:** faint yellow needle crystal; HR-ESI/MS:  $m/z$  337.1071  $[M+H]^+$ ; molecular formula: C<sub>20</sub>H<sub>16</sub>O<sub>5</sub>; <sup>1</sup>H NMR (DMSO-d<sub>6</sub>, δ, ppm): 1.38 (6H, s, 5''-H and 6''-H), 5.68 (1H, d,  $J=10.0$ , 3''-H), 6.34 (1H, d,  $J=8.3$ , 5'-H), 6.68 (1H, d,  $J=10.0$ , 4''-H), 6.91 (1H, d,  $J=1.9$ , 8-H), 6.93 (1H, d,  $J=8.3$ , 6'-H), 6.97 (1H, dd,  $J=8.8$ , 1.9, 6-H), 7.98 (1H, d,  $J=8.8$ , 5-H), 8.25 (1H, s, 2-H), 9.11 (1H, s, 2'-OH), 10.85 (1H, s, 7-OH). <sup>1</sup>H and <sup>13</sup>C NMR data were identical with the literature values of glabrone <sup>[2]</sup>.

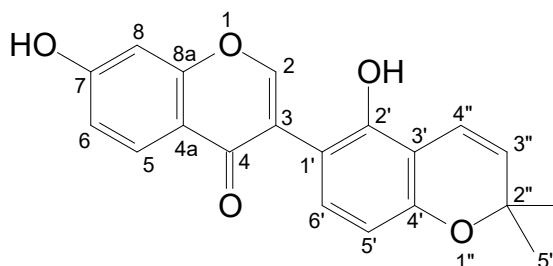

**Glabrone**

**GF-3:** yellow needle crystal; HR-ESI/MS:  $m/z$  353.1012  $[M+H]^+$ ; molecular formula: C<sub>20</sub>H<sub>16</sub>O<sub>6</sub>; <sup>1</sup>H NMR (DMSO-d<sub>6</sub>, δ, ppm): 6.72 (1H, s, H-3), 7.87 (1H,  $J=9.0$ , H-5), 7.91 (2H, m, H-2', 6'), 6.97 (1H, d,  $J=2.5$ , H-8), 6.93 (2H, m, H-3', 5'), 6.89 (1H, m, H-6), 10.73 (1H, br, 7-OH), 10.26 (1H, br, 4'-OH). <sup>1</sup>H and <sup>13</sup>C NMR data were in agreement with the literature values of 7, 4'-dihydroxyflavone <sup>[3]</sup>.

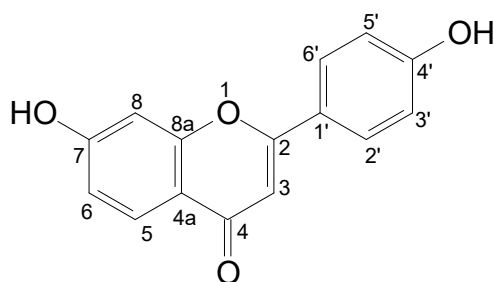

**7, 4'-dihydroxyflavone**

**GF-4:** faint yellow needle crystal; HR-ESI/MS:  $m/z$  367.1187  $[M+H]^+$ ; molecular formula:  $C_{21}H_{18}O_6$ ;  $^1H$  NMR (DMSO- $d_6$ ,  $\delta$ , ppm): 1.76 (6H, s, 4''-H and 5''-H), 3.32 (2H, d,  $J=6.8$ , 1''-H), 3.90 (3H, s, 5-OCH<sub>3</sub>), 5.19 (1H, m, 2''-H), 6.77 (1H, s, 8-H), 6.95 (1H, dd,  $J=2.0$ , 8.4, 5'-H), 7.17 (1H, d,  $J=1.6$ , 3'-H), 7.71 (1H, d,  $J=8.4$ , 6'-H), 7.71 (1H, d,  $J=8.4$ , 6'-H), 10.04 (1H, s, 4'-OH), 10.81 (1H, s, 7-OH).  $^1H$  and  $^{13}C$  NMR data were in agreement with the literature values of neoglycyrol [4].

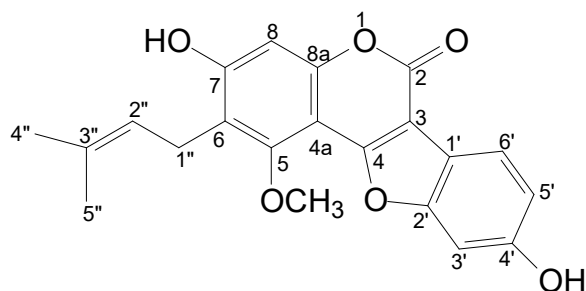

**Neoglycyrol**

**GF-5:** yellow needle crystal; HR-ESI/MS:  $m/z$  269.0808  $[M+H]^+$ ; molecular formula:  $C_{16}H_{12}O_4$ ;  $^1H$  NMR (DMSO- $d_6$ ,  $\delta$ , ppm): 3.77 (3H, s, 4'-OCH<sub>3</sub>), 6.97 (2H, d,  $J=8.7$ , 3'-H), 7.49 (2H, d,  $J=8.7$ , 2'-H), 8.31 (1H, s, 2-H), 7.96 (1H, d,  $J=8.8$ , 5-H), 6.92 (1H, dd,  $J=8.8$ , 2.0, 6-H), 6.87 (1H, d,  $J=2.0$ , 8-H), 10.75 (1H, s, 7-OH);  $^1H$  and  $^{13}C$  NMR data were in agreement with the literature values of formononetin [5].

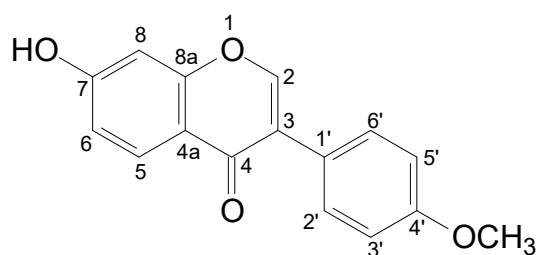

**Formononetin**

**GF-6:** yellow needle crystal; HR-ESI/MS:  $m/z$  339.1590  $[M+H]^+$ ; molecular formula:  $C_{21}H_{22}O_4$ ;  $^1H$

NMR (DMSO-d<sub>6</sub>,  $\delta$ , ppm): 1.45 (6H, s, 4''-H and 5''-H), 3.83 (3H, s, 2-OCH<sub>3</sub>), 4.95 (1H, d,  $J=17.8$ , 3''a-H), 4.92 (1H, d,  $J=10.3$ , 3''b-H), 6.24 (1H, dd,  $J=17.8, 10.3$ , 2''-H), 6.52 (1H, s, 3-H), 6.88 (2H, d,  $J=8.5$ , 3'-H and 5'-H), 7.52 (1H, s, 6-H), 7.58 (1H, d,  $J=15.0$ ,  $\alpha$ -H), 7.89 (1H, d,  $J=15.0$ ,  $\beta$ -H), 7.97 (2H, d,  $J=8.5$ , 2'-H and 6'-H), 10.28 (1H, s, 4'-OH), 10.10 (1H, s, 4-OH). <sup>1</sup>H and <sup>13</sup>C NMR data were identical with the literature values of licochalcone A [6].

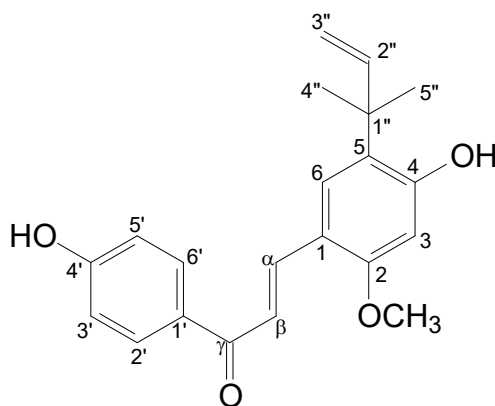

**Licochalcone A**

**GF-7:** white needle crystal; HR-ESI/MS:  $m/z$  257.0809 [M+H]<sup>+</sup>; molecular formula: C<sub>15</sub>H<sub>12</sub>O<sub>4</sub>; <sup>1</sup>H NMR (DMSO-d<sub>6</sub>,  $\delta$ , ppm): 2.63 (1H, dd,  $J=16.8, 2.8$ , 3a-H), 3.10 (1H, dd,  $J=12.8, 16.7$ , 3b-H), 5.44 (1H, dd,  $J=12.8, 2.7$ , 2-H), 6.33 (1H, d,  $J=2.1$ , 8-H), 6.50 (1H, dd,  $J=2.1, 8.6$ , 6-H), 6.79 (2H, d,  $J=8.5$ , 3'-H and 5'-H), 7.32 (2H, d,  $J=8.5$ , 2'-H and 6'-H), 7.64 (1H, d,  $J=8.7$ , 5-H), 10.51 (1H, s, 7-OH), 9.52 (1H, s, 4'-OH). <sup>1</sup>H and <sup>13</sup>C NMR data were identical with the literature values of liquiritigenin [5].

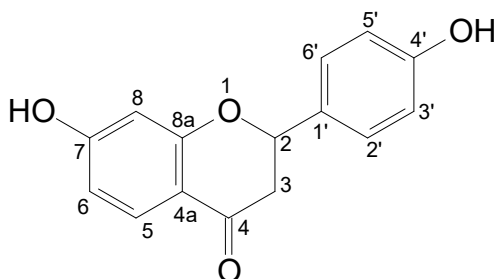

**Liquiritigenin**

**GF-8:** yellow needle crystal; HR-ESI/MS:  $m/z$  257.0805 [M+H]<sup>+</sup>; molecular formula: C<sub>15</sub>H<sub>12</sub>O<sub>4</sub>; <sup>1</sup>H NMR (DMSO-d<sub>6</sub>,  $\delta$ , ppm): 6.42 (1H, d,  $J=8.6$ , 6'-H), 6.84 (2H, dd,  $J=8.6, 2.2$ , 5'-H), 7.51 (1H, d,  $J=15.0$ ,  $\alpha$ -H), 7.74 (2H, m, 3-H and 5-H), 7.72 (2H, m, 2-H, and 6-H), 7.82 (1H, d,  $J=15.0$ ,  $\beta$ -H), 8.15 (1H, d,  $J=2.2$ , 3'-H), 10.10 (1H, s, 4-OH), 10.60 (1H, s, 2'-OH), 13.57 (1H, s, 4'-OH). <sup>1</sup>H and <sup>13</sup>C NMR data were identical with the literature values of isoliquiritigenin [7].

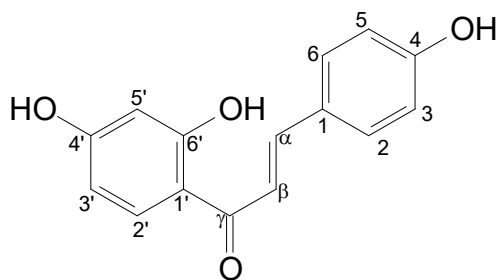

**Isoliquiritigenin**

**GF-9:** faint yellow needle crystal; HR-ESI/MS:  $m/z$  323.1278  $[M+H]^+$ ; molecular formula:  $C_{20}H_{18}O_4$ ;  $^1H$  NMR (DMSO- $d_6$ ,  $\delta$ , ppm): 1.68 (3H, s, 5''-H), 1.73 (3H, s, 4''-H), 3.29 (1H, d,  $J=7.3$ , 1''-H), 5.32 (1H, t,  $J=7.3$ , 2''-H), 6.69 (1H, s, 3-H), 6.92 (2H, d,  $J=8.7$ , 3'-H and 5'-H), 6.97 (1H, s, 8-H), 7.66 (1H, s, 5-H), 7.88 (2H, d,  $J=8.7$ , 2'-H and 6'-H), 10.21 (1H, s, 4'-OH), 10.81 (1H, s, 7-OH).  $^1H$  and  $^{13}C$  NMR data were identical with the literature values of licoflavone [8].

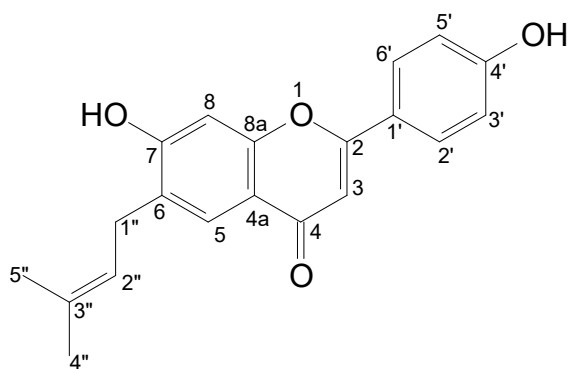

**Licoflavone**

**GF-10:** yellow needle crystal; HR-ESI/MS:  $m/z$  315.0866  $[M+H]^+$ ; molecular formula:  $C_{17}H_{14}O_6$ ;  $^1H$  NMR (DMSO- $d_6$ ,  $\delta$ , ppm): 3.86 (3H, s, 7-OCH<sub>3</sub>), 3.80 (3H, s, 3-OCH<sub>3</sub>), 6.36 (1H, d,  $J=1.8$ , 8-H), 6.72 (1H, d,  $J=1.8$ , 6-H), 6.95 (2H, d,  $J=8.7$ , 3'-H and 5'-H), 7.97 (2H, d,  $J=8.7$ , 2'-H and 6'-H), 10.25 (1H, s, 4'-OH), 12.66 (1H, s, 5-OH);  $^1H$  and  $^{13}C$  NMR data were identical with the literature values of kumatakenin A [9].

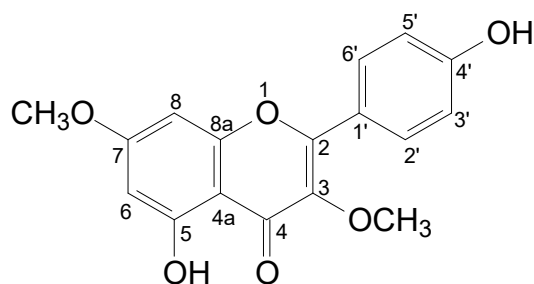

**Kumatakenin A**

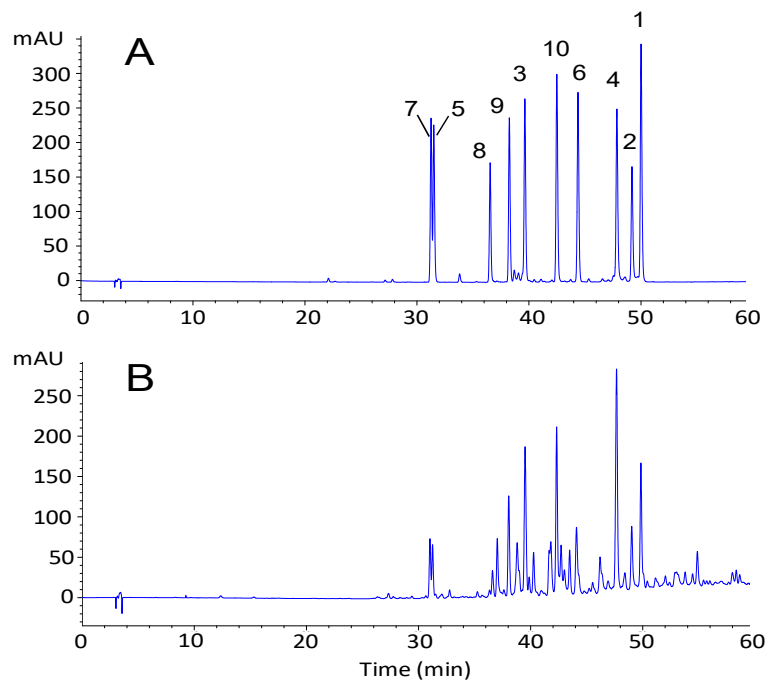

**Part 2. HPLC of isolated flavonoids and dichloromethane extract of *G. uralensis***

(A) 10 flavonoids isolated from CH<sub>2</sub>Cl<sub>2</sub> extract of *G. uralensis*; (B) CH<sub>2</sub>Cl<sub>2</sub> extract of *G. uralensis*

## References

1. Saitoh, T., Noguchi, H., & Shibata, S. A new isoflavone and the corresponding isoflavanone of licorice root. *Chemical and Pharmaceutical Bulletin*. 1978, 26, 144-147.
2. Liu, F., Ni, H., Qing, D. G., Meng, D. L., Li, N., & Jia, X. G. Chemical constituents from the residues of *Glycyrrhiza inflata* Batal. *Chinese Journal of Medicinal Chemistry*, 2011, 4, 312-314.
3. Jayaprakasam, B., Doddaga, S., Wang, R., Holmes, D., Goldfarb, J., & Li, X. M. Licorice flavonoids inhibit eotaxin-1 secretion by human fetal lung fibroblasts in vitro. *Journal of agricultural and food chemistry*. 2009, 57, 820-825.
4. Wang, C. L., Zhang, R. Y., Han, Y. S., Dong, X. G., & Liu, W. B. Chemical studies of coumarins from *Glycyrrhiza uralensis* Fisch. *Acta pharmaceutica Sinica*. 1991, 26, 147-151.
5. Zhu, D. Y., Song, G. Q., Jiang, F. X., Chang, X. R., & Guo, W. B. Studies on chemical constituents of *Glycyrrhiza uralensis* Fisch---the structures of isolicoflavonol and glycy coumarin. *Acta Chimica Sinica*. 1984, 42, 1080-1084.
6. Kajiyama, K., Demizu, S., Hiraga, Y., Kinoshita, K., Koyama, K., Takahashi, K., Kinoshita, T. Two prenylated retrochalcones from *Glycyrrhiza inflata*. *Phytochemistry*. 1992, 31, 3229-3232.
7. Fukai, T., Marumo, A., Kaitou, K., Kanda, T., Terada, S., Nomura, T. Anti-Helicobacter pylori flavonoids from licorice extract. *Life sciences*. 2002, 71, 1449-1463.
8. Yang, L., Che, Q. M., Bi, C., Sun, Q. S. Studies on flavonoids from the residues of *Glycyrrhiza inflata* Batal. *Chinese Traditional and Herbal Drugs*. 2007, 38, 671-673.
9. Saitoh, T., Kinoshita, T., & Shibata, S. Flavonols of licorice root. *Chemical and Pharmaceutical Bulletin*. 1976, 24, 1242-1245.
